# Supplementary material for: The Development and Psychometric Validation of the Japanese Version of the Home Healthcare Nurses’ Job Satisfaction: A Cross-Sectional Study Among Japanese Home Healthcare Nurses
Source: Research Square preprint supplement (doi:10.21203/rs.3.rs-841900/v1), 2021-09-16
Supplement: Supplementary file 1 [file 713d12e03c97f69822239143.xlsx]

## Sheet: Additional file1
Additional file1 the Home Healthcare Nurses'Job Satisfaction Scale (HHNJS) (Ellenbecker et al.,2008)
	Subscales	Items
	Relationship with Patients	Patients are satisfied with the care that I provide
		The relationships that I have established with patients are rewarding
		I have helped patients maintain or improve their quality of life
		My work is important and worthwhile
		The patient care that I provide adheres to my professional standards
	Relationship with Peers	The support I have from my nursing peers is a positive aspect of my job
		I can communicate comfortably with the nurses I work with
		There is a good amount of collegiality among the nurses I work with
		I have peers whom I can rely on and turn to if necessary
	Professional Pride	If I had to do it over again,I would choose home healthcare as my area of practice
		I would recommend my job to another health care professional
		I am proud to talk to people about the work I do
	Relationship with Physician	Physicians value my input on the status of their home healthcare patients
		I am treated as a professional colleague by physicians
	Relationship with Organization	I am satisfied with the professional relationship that I have with nursing administration at this agency
		I have the power to generate change in organizational policy at this agency
		I have the opportunity to grow and develop as a professional nurse within this agency
	Autonomy and Control	I am able to adjust the hours of my work if needed
		I have more flexibility in my hours of work than murses in other practice settngs
		I have sufficient control over scheduling my time
		I have the independence to make important decisions in my day-to-day work
	Stress & Workload	At times I am overwhelmed by all the work I have to do
		I could deliver better patient care if I had more time
		I am able to meet the demands of my job
		I am able to cope with the increased demands for documentation in homecare
		Sometimes I get frustrated because all my activities are programmed for me
	Salary & Benefits	My present salary is satisfactory
		An upgrading of the pay scales at this agency is needed
		Nursing salaries at other agencies are better than salaries at this agency
		The benefit package at this agency is satisfactory to me

## Sheet: Additional file2
	Additional file2 Item Analysis and Exploretry Factor analysis of 30-items(same as original HHNJS Scale) Japanese version exploration
Items of HHNJS-J(α=.89)and factors with Cronbach's α coefficient		mean	SD	ceiling effect	floor effect	Facror loadinga
						Facror1	Facror2	Facror3	Facror4	Facror5	Facror6	Facror7
Relationship with patients(α＝.79)
1	Patients are satisfied with the care that I provide.	3.64059	0.586127	4.23	3.05	-0.0433555	0.638943	0.0856173	-0.0254944	-0.0827361	0.101158	0.174743
2	The relationships I have built with patients is valuable.	3.98533	0.509498	4.49	3.48	-0.00872204	0.776631	-0.142481	0.0249946	-0.0288798	-0.0557951	0.0672048
3	I am helping to maintain or improve patients' quality of life.	3.97311	0.450229	4.42	3.52	-0.00653231	0.864167	-0.0510453	-0.17266	0.00122151	-0.0556278	-0.0758288
4	My job is important and fulfilling.	4.07579	0.697774	4.77	3.38	0.102693	0.435767	0.103608	0.256461	0.0190813	-0.146543	-0.22758
5	The patient care that I provide conforms to professional standards (ethical norms and accountability).	3.97311	0.53939	4.51	3.43	0.14084	0.523326	-0.0328684	-0.0540075	0.121033	-0.0871756	-0.0969206
Relationship with colleagues (α＝.90)
6	Being able to get support from my colleagues is a good aspect of my job.	4.12714	0.617134	4.74	3.51	0.570169	0.130229	0.0281485	0.0479044	0.133368	-0.0615861	-0.170093
7	I am getting along with the nurses with whom I work.	4.13692	0.675794	4.81	3.46	0.976449	0.0202825	-0.0419988	-0.0758246	-0.106868	0.00663792	0.159128
8	I have a cooperative relationship with the nurses with whom I work.	4.08557	0.717438	4.8	3.37	0.978587	-0.0148903	-0.0235518	-0.048992	-0.0448179	0.0382922	0.157198
9	I have colleagues whom I can trust and rely on when I needed them.	4.17359	0.715163	4.89	3.46	0.78559	-0.0691353	-0.022518	0.0734531	0.0354148	0.0212705	-0.0452224
Professional pride (α＝.86)
10	Even if I were to choose my specialty again, I would probably choose home health nursing.	3.66015	1.03583	4.7	2.62	0.0209533	-0.132241	-0.0980776	0.896037	-0.0209594	0.0999861	0.200937
11	I would like to recommend my job to other health professionals.	3.69193	0.93827	4.63	2.75	-0.0458607	-0.114986	-0.0166933	0.955371	0.0327229	0.0605208	0.0340812
12	I speak with pride when I discuss my job with others.	3.94621	0.858659	4.8	3.09	0.0299025	0.119196	0.0636899	0.698014	-0.00397631	-0.0203666	-0.0282463
Relationship with doctors and institution (α＝.84)
13	Doctors respect my opinions regarding home-care patients.	3.41809	0.785135	4.2	2.63	-0.0623177	0.182295	0.525338	0.248533	-0.103904	-0.128874	-0.0153887
14	Doctors treat me as a colleague, a nursing specialist.	3.26406	0.853886	4.12	2.41	-0.0652924	0.0629088	0.651808	0.10975	-0.0925905	-0.112903	0.0194678
15	I am content with the professional relationship that we have with the nurse administrator of this facility.	3.55501	0.903441	4.46	2.65	0.300647	-0.0132154	0.601426	-0.00800897	-0.0129466	0.0956836	0.0433855
16	I have some influence on organizational policy changes at this facility.	2.91932	1.04827	3.97	1.87	0.0233996	-0.238971	0.567115	-0.0101104	0.122903	-0.212782	0.257443
17	I have the opportunity to develop skills that will advance my nursing expertise at this facility.	3.49144	0.891435	4.38	2.6	0.147187	-0.0798828	0.485979	0.105076	0.153752	-0.0934009	-0.0151138
Autonomy and control(α＝.78)
18	I can adjust my working hours if necessary.	3.65037	0.930162	4.58	2.72	0.0406288	-0.0454994	0.0548671	0.0106872	0.720815	-0.0329402	-0.0481827
19	I can change my working hours more flexibly than other clinical nurses.	3.53056	0.987505	4.52	2.54	-0.0821119	-0.0679808	-0.015753	-0.0153998	0.849724	0.0176146	0.00504374
20	I can adequately manage my time outside of work.	3.45477	0.930703	4.39	2.52	0.0512913	0.126153	-0.0831636	0.0189371	0.602397	0.260078	0.00236642
21	I independently make important decisions in my daily work.	3.6357	0.835368	4.47	2.8	-0.0438184	0.204077	0.0988209	0.0144464	0.424232	-0.116737	0.146175
Stress and workload (α＝.45)
22	Sometimes, I am overwhelmed by the amount of work that I have to do.	2.42054	0.944109	3.36	1.48	-0.0426199	-0.0265435	0.0242951	0.0512767	0.0724239	0.729136	0.0149019
23	If I had more time, I would probably be able to provide better patient care.	2.48166	0.854791	3.34	1.63	0.0556087	-0.0612817	0.0683405	0.0547518	0.028961	0.514047	-0.0884133
24	I can carry out everything that my job requires.	3.57457	0.730927	4.31	2.84	-0.0283855	0.496165	0.10962	0.0474298	-0.0416901	0.18932	0.37962
25	I can handle the growing demand for documentation in home health nursing.	3.22494	0.797216	4.02	2.43	-0.0558916	0.287916	0.261544	-0.0608321	0.0986706	0.082028	0.287337
26	Sometimes, I experience stress from the fact that my duties are predetermined.	3.06357	0.939789	4	2.12	0.115848	0.0508076	0.129589	0.188769	-0.0499738	0.295363	-0.261153
Salary and benefits (α＝.51)
27	I am satisfied with my current salary.	2.83863	1.08618	3.92	1.75	-0.0342201	0.0235893	0.619975	-0.0122974	0.0023499	0.146207	-0.271995
28	The pay scale at this facility needs improvement.	2.51589	0.957615	3.47	1.56	-0.0583042	-0.0878613	0.703445	-0.177473	-0.05831	0.164293	-0.497022
29	The salary at other facilities is higher than at this one.	2.91687	0.933018	3.85	1.98	-0.087608	-0.000558835	0.142473	-0.0763906	0.0224229	0.0310813	-0.40125
30	I am satisfied with the employee benefits provided at this facility.	2.8533	1.01605	3.87	1.84	-0.0530438	-0.0261234	0.60891	-0.0978312	0.0273003	0.100145	-0.152422
Bold figures indicate factor loading >0.4
a:Factor loadings were based on exploratory factor analysis with maximum likelihood method and Promax rotation
HHNJS-J:Japanese version of the Home Healthcare Nurses' Job Satisfaction Scale
